# Supplementary material for: Is Cortical Theta-Gamma Phase-Amplitude Coupling Memory-Specific?
Source: MDPI journal article supplement (doi:10.3390/brainsci12091131), 2022-08-25
Supplement: s1 [file s1]

# **Is Cortical Theta-Gamma Phase-Amplitude Coupling Memory-Specific?**

**Orestis Papaioannou <sup>1,\*</sup>, Laura P. Crespo <sup>1</sup>, Kailey Clark <sup>1</sup>, Nicole N. Ogbuagu <sup>1</sup>, Luz Maria Alliende <sup>1</sup>,  
Steven M. Silverstein <sup>2</sup> and Molly A. Erickson <sup>1</sup>**

<sup>1</sup> Department of Psychiatry & Behavioral Neuroscience, University of Chicago, Chicago, IL 60637, USA

<sup>2</sup> Departments of Psychiatry, Neuroscience and Ophthalmology, University of Rochester, Rochester, NY 14627, USA

\* Correspondence: opapaioannou@uchicago.edu

## Section S1

### Differences in the consistency of theta-gamma amplitude across electrode cluster

One interesting and unexpected finding is that the consistency of coupling across neighboring channels differed as a function of electrode cluster. This pattern was most evident in the low gamma band (see figure AI1), but in general frontal electrodes showed consistent coupling, with gamma amplitude from most frontal electrodes peaking at the same theta phase. Conversely, electrodes in the posterior cluster show much more variability in the particular theta phase where gamma amplitude is maximal. It seems that theta-gamma phase-amplitude coupling shifts in phase-space (although crucially remains comparable in size) as you move from posterior to occipital electrodes. Furthermore, posterior, but not occipital electrodes show some lateralization effects, with gamma amplitude for electrodes on different hemispheres peaking at slightly different phases.

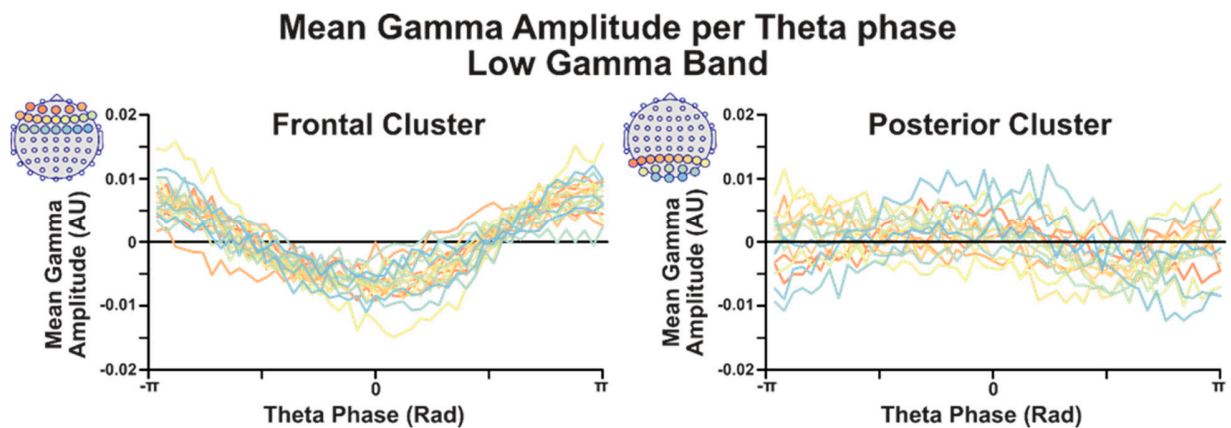

Figure S1: Mean gamma amplitude (across the low gamma band) by theta phase plotted separately for each electrode in our two clusters. Note that electrodes in the frontal cluster show mostly the same response to theta phase, while electrodes in the posterior cluster differ in their specific tuning. The scalp maps on the top left of each plot indicate which electrode corresponds to each line in the plot.

It is unclear if there is any functional significance to this difference, as both clusters show similar overall levels of coupling. It is possible that this indicates different levels of coordination across frontal and posterior areas of the brain. For example, it could be that the more localized coupling seen in posterior electrodes may result from the more localized stimulus representations found in posterior visual areas, with different stimulus representations peaking at different theta phases to keep visual objects separable. Conversely, coupling in frontal electrodes may represent activity in the prefrontal cortex. Thus, theta signaling here may not act in a more distributed manner to gate higher order processes such as attentional control across larger swathes of the prefrontal cortex. Note however that this interpretation is purely hypothetical, and we can not make any strong claims as to the source or significance of these effects.

## Section S2

### Replication Sample Results

Given the exploratory nature of our analyses, we also collected data from a secondary sample of 20 participants to act as a replication sample for our main findings. All signal processing and statistical analyses were performed in identical manner to the original primary sample. The table below summarizes the results of main statistical comparisons for this replication sample.

Table S1: A summary of the replication sample results from the task  $\times$  time-window ANOVAs. When marking significance, \*\*\* denotes  $p < 0.001$ .

#### Task by Time-Window ANOVAs

| Cluster   | Frequency Band | Effect            | dfs         | F     | p(GG)     | $\eta^2$ | BF10               |
|-----------|----------------|-------------------|-------------|-------|-----------|----------|--------------------|
| Frontal   | High           | Time Window       | 1, 19       | 13396 | <0.001*** | 0.980    | >10 <sup>116</sup> |
| Frontal   | High           | Task              | 183, 34.8   | 1.07  | 0.35      | 0.008    | 0.079              |
| Frontal   | High           | Timewindow X Task | 1.74, 33.1  | 0.03  | 0.955     | 0.000    | --                 |
| Frontal   | Low            | Time Window       | 1, 19       | 5634  | <0.001*** | 0.986    | >10 <sup>115</sup> |
| Frontal   | Low            | Task              | 1.67, 31.8  | 0.63  | 0.508     | 0.006    | 0.079              |
| Frontal   | Low            | Timewindow X Task | 1.58, 30.0  | 0.385 | 0.634     | 0.002    | --                 |
| Posterior | High           | Time Window       | 1, 19       | 32234 | <0.001*** | 0.990    | >10 <sup>128</sup> |
| Posterior | High           | Task              | 1.81, 34.3  | 0.09  | 0.893     | 0.001    | 0.081              |
| Posterior | High           | Timewindow X Task | 184, 34.9   | 0.47  | 0.61      | 0.004    | --                 |
| Posterior | Low            | Time Window       | 1, 19       | 28648 | <0.001*** | 0.995    | >10 <sup>135</sup> |
| Posterior | Low            | Task              | 1.91, 112.7 | 2.62  | 0.09      | 0.044    | 0.079              |
| Posterior | Low            | Timewindow X Task | 1.91, 112.6 | 0.27  | 0.741     | 0.003    | --                 |

Table S2: The result from the replication sample for the linear mixed effects models using the focused contrast testing whether PLV in the Active WM+ condition is higher than the other two conditions. When marking significance, denotes  $p < 0.001$ .

| Contrast Analysis Results |                |                   |    |       |           |                  |
|---------------------------|----------------|-------------------|----|-------|-----------|------------------|
| Cluster                   | Frequency Band | Effect            | df | t     | p         | Cohen's d        |
| Frontal                   | High           | Time Window       | 95 | 127   | <0.001*** | >10 <sup>4</sup> |
| Frontal                   | High           | Task              | 95 | -1.10 | 0.271     | 0.124            |
| Frontal                   | High           | Timewindow X Task | 95 | -0.05 | 0.961     | 0.000            |
| Frontal                   | Low            | Time Window       | 95 | 114   | <0.001*** | >10 <sup>4</sup> |
| Frontal                   | Low            | Task              | 95 | 0.27  | 0.782     | 0.007            |
| Frontal                   | Low            | Timewindow X Task | 95 | 0.6   | 0.550     | 0.037            |
| Posterior                 | High           | Time Window       | 95 | 149   | <0.001*** | >10 <sup>4</sup> |
| Posterior                 | High           | Task              | 95 | 0.51  | 0.605     | 0.027            |
| Posterior                 | High           | Timewindow X Task | 95 | -0.5  | 0.617     | 0.026            |
| Posterior                 | Low            | Time Window       | 95 | 164   | <0.001*** | >10 <sup>4</sup> |
| Posterior                 | Low            | Task              | 95 | 1.57  | 0.119     | 0.253            |
| Posterior                 | Low            | Timewindow X Task | 95 | -0.33 | 0.742     | 0.011            |

Table S3: A summary of the replication sample results from pairwise comparisons of the mean PLV in the frontal and posterior clusters. A false discovery rate correction was to correct for multiple comparisons. The FDR column denotes which comparisons were significant after correction. When marking significance, \* significance after FDR correction.

## Pairwise Comparisons Between Electrode Clusters

| Cluster   | PLV   |       | Time window   | Frequency Band | Task        | df | t     | p    | FDR  | Cohen's d |
|-----------|-------|-------|---------------|----------------|-------------|----|-------|------|------|-----------|
|           | Mean  | SD    |               |                |             |    |       |      |      |           |
| Frontal   | 0.105 | 0.005 | Pre-Stimulus  | High           | Active WM+  | 59 | −0.70 | 0.49 | n.s. | −0.09     |
| Posterior | 0.109 | 0.004 |               |                |             |    |       |      |      |           |
| Frontal   | 0.106 | 0.005 | Pre-Stimulus  | High           | Active WM-  | 59 | 2.05  | 0.05 | n.s. | 0.26      |
| Posterior | 0.109 | 0.003 |               |                |             |    |       |      |      |           |
| Frontal   | 0.106 | 0.005 | Pre-Stimulus  | High           | Passive WM- | 59 | −0.19 | 0.85 | n.s. | −0.02     |
| Posterior | 0.109 | 0.003 |               |                |             |    |       |      |      |           |
| Frontal   | 0.114 | 0.002 | Pre-Stimulus  | Low            | Active WM+  | 59 | 0.36  | 0.72 | n.s. | 0.05      |
| Posterior | 0.116 | 0.003 |               |                |             |    |       |      |      |           |
| Frontal   | 0.114 | 0.002 | Pre-Stimulus  | Low            | Active WM-  | 59 | −1.01 | 0.29 | n.s. | −0.13     |
| Posterior | 0.114 | 0.002 |               |                |             |    |       |      |      |           |
| Frontal   | 0.114 | 0.003 | Pre-Stimulus  | Low            | Passive WM- | 59 | −2.64 | 0.02 | n.s. | −0.34     |
| Posterior | 0.115 | 0.002 |               |                |             |    |       |      |      |           |
| Frontal   | 0.176 | 0.004 | Post-Stimulus | High           | Active WM+  | 59 | −2.02 | 0.06 | n.s. | −0.26     |
| Posterior | 0.179 | 0.006 |               |                |             |    |       |      |      |           |
| Frontal   | 0.177 | 0.004 | Post-Stimulus | High           | Active WM-  | 59 | 1.02  | 0.32 | n.s. | 0.13      |
| Posterior | 0.180 | 0.005 |               |                |             |    |       |      |      |           |
| Frontal   | 0.177 | 0.004 | Post-Stimulus | High           | Passive WM- | 59 | −0.91 | 0.38 | n.s. | −0.12     |
| Posterior | 0.179 | 0.006 |               |                |             |    |       |      |      |           |
| Frontal   | 0.186 | 0.003 | Post-Stimulus | Low            | Active WM+  | 59 | 0.90  | 0.38 | n.s. | 0.12      |
| Posterior | 0.187 | 0.005 |               |                |             |    |       |      |      |           |
| Frontal   | 0.184 | 0.003 | Post-Stimulus | Low            | Active WM-  | 59 | −1.76 | 0.09 | n.s. | −0.23     |
| Posterior | 0.186 | 0.006 |               |                |             |    |       |      |      |           |
| Frontal   | 0.185 | 0.003 | Post-Stimulus | Low            | Passive WM- | 59 | −1.24 | 0.23 | n.s. | −0.16     |
| Posterior | 0.187 | 0.005 |               |                |             |    |       |      |      |           |
